# Supplementary material for: Proteinuria as a predictor of 24-hour albuminuria ≥30 mg in patients with lifestyle-related diseases
Source: Research Square preprint supplement (doi:10.21203/rs.3.rs-7674258/v1), 2025-09-30
Supplement: Supplementary file 2 [file b114229f6e6ba88a99a09eca.xlsx]

## Sheet: Sheet9
		Supplementary Table 1. Association between 24-hour proteinuria and the median 24-hour albuminuria (interquartile range)
		in patients with lifestyle-related diseases
		24-hour		median 24-hour	median 24-hour	24-hr albuminuria(mg/day)		median 24-hr albuminuria/	(Q3 − Q1 24-hr albuminuria)
		proteinuria (mg/day)	n	proteinuria (mg/day)	albuminuria (mg/day)	Q1	Q3	median 24-hr proteinuria	/median 24-hr albuminuria
		0-<5.0	54	0.9	10.2885	5.15651	20.385	-	-
		5.0-<15.0	42	9.81621	11.6134	5.80875	24.7888	1.18309	1.63431
		15-<25	41	19.6	13.78	7.955	24.4374	0.703061	1.19611
		25-<35	50	30.0128	13.9833	7.79622	22.7843	0.46591	1.07186
		35-<45	35	39.164	19.8	13.4207	30.8045	0.505566	0.87797
		45-<55	30	49.1469	20.4431	16.575	30.1287	0.415959	0.662997
		55-<65	27	59.8	21.412	12.7254	43.8307	0.35806	1.4527
		65-<75	25	68.6	20.02	14.0777	41.325	0.291837	1.361
		75-<85	24	79.25	26.3968	15.555	46.1063	0.333083	1.15738
		85-<95	16	88.3273	51.6225	18.9653	63.5675	0.584446	0.864008
		95-<105	10	97.75	49.635	32.0228	59.866	0.507775	0.56096
		105-<115	12	107.777	44.0226	31.2086	56.3188	0.408462	0.570394
		115-<125	7	118.64	62.32	54.904	70.3409	0.525285	0.247703
		125-<135	7	129.2	73.37	51.1091	75.225	0.567879	0.328689
		135-<145	2	140.4	28.86	-	-	-	-
		145-<155	3	153	52.35	38.2402	84.05	0.342157	0.875067
		155-<165	5	158.6	100.31	59.83	112.728	0.632471	0.527343
		165-<175	7	169.6	81.5591	68.85	107.243	0.480891	0.470736
		175-<185	3	178.477	159.124	144.242	170.867	0.891564	0.167324
		n: number of cases, Q1: first quartile, Q3: third quartile

## Sheet: Sheet10
		Supplementary Table 2. Association between urine protein-to creatinine ratio and
		the median urinary albumin-to-creatinine ratio (interquartile range) in patients with lifestyle-related diseases
				median	median	uACR (mg/gCr)
		uPCR (mg/gCr)	n	uPCR (mg/gCr)	uACR (mg/gCr)	Q1	Q3
		0-<5	54	0	9.80985	4.41061	21.9674
		5-<15	44	11	13.5605	5.78131	32.9798
		15-<25	32	21	12.237	7.06412	23.1733
		25-<35	44	29	16.1458	10.8474	23.7056
		35-<45	38	41	17.9028	8.33191	31.1561
		45-<55	31	50	18.7082	9.54741	28.7583
		55-<65	20	59	22.9086	16.1227	38.832
		65-<75	24	68	39.7376	26.7622	61.4247
		75-<85	15	79	49.1262	18.4294	58.9591
		85-<95	18	89	45.28	19.324	58.6587
		95-<105	16	97	35.2358	25.8925	55.9566
		105-<115	17	108	32.4885	19.2478	61.7852
		115-<125	9	121	54.6218	53.0266	69.9394
		125-<135	6	132	75.291	31.6771	103.581
		135-<145	8	141	79.6143	47.4962	106.512
		145-<155	2	152	51.9404	-	-
		155-<165	7	156	37.3832	31.0797	57.3614
		165-<175	2	168	83.4101	-	-
		175-<185	5	182	99.5825	49.0066	106.892
		uPCR: urine protein-to creatinine ratio, uACR: urine albumin-to-creatinine ratio
		n: number of cases, Q1: first quartile, Q3: third quartile

## Sheet: Sheet11
		Supplementary Table 3. The analysis of the utility of 24-hr proteinuria for distinguishing between 24-hr albuminuria ≥ 30mg/day and <30mg/day across various subgroups in patients with lifestyle-related diseases
				n: 24-hr albuminuria					CO* of 24-hour
				<30mg	≥30mg	AUC	SE	P value	proteinuria (mg)	Sensitivity	Specificity	PPV	NPV	Distance	Se+Sp-1
		age (year)	<65	76	50	0.843684	0.0397095	4.93105e-18	55.3086	0.78	0.776316	0.696429	0.842857	0.313743	0.556316
									78.8	0.64	0.934211	0.864865	0.797753	0.365962	0.574211
			≥65, <80	112	91	0.828493	0.0296679	1.70862e-28	52.2	0.736264	0.785714	0.736264	0.785714	0.339816	0.521978
									65.7702	0.692308	0.848214	0.7875	0.772358	0.343094	0.540522
			≥80	79	42	0.825347	0.0444635	2.53279e-13	64.8471	0.738095	0.848101	0.72093	0.858974	0.302766	0.586197
		sex	male	133	122	0.853106	0.0241536	2.11831e-48	78.2	0.721311	0.864662	0.830189	0.771812	0.309812	0.585973
			female	134	61	0.779423	0.0393969	1.31713e-12	40.6	0.704918	0.746269	0.558442	0.847458	0.38917	0.451187
									65.6	0.540984	0.932836	0.785714	0.816993	0.463904	0.473819
		WC≥85 cm in male or	-	155	68	0.82111	0.034221	6.38629e-21	47.0204	0.764706	0.748387	0.571429	0.878788	0.344489	0.513093
		≥90 cm in female							65.2531	0.661765	0.870968	0.692308	0.85443	0.362012	0.532732
			+	112	115	0.828377	0.0274089	4.48594e-33	63.7557	0.73913	0.803571	0.794393	0.75	0.326553	0.542702
		BMI	<25 (Kg/m2)	186	105	0.824578	0.0275857	5.83271e-32	58.8	0.72381	0.806452	0.678571	0.837989	0.337257	0.530261
									65.2531	0.685714	0.854839	0.727273	0.828125	0.34619	0.540553
			≥25 (Kg/m2)	81	78	0.840139	0.0318226	1.15103e-26	63.7557	0.74359	0.814815	0.794521	0.767442	0.316291	0.558405
		BMI	<30 (Kg/m2)	257	161	0.829736	0.0220028	9.05318e-51	56	0.73913	0.782101	0.68	0.82716	0.339901	0.521232
									64.8471	0.695652	0.840467	0.732026	0.815094	0.343625	0.536119
			≥30 (Kg/m2)	10	22	0.840909	0.0725693	2.631e-06	67.443	0.772727	0.8	0.894737	0.615385	0.302742	0.572727
									38.2909	0.909091	0.7	0.869565	0.777778	0.313472	0.609091
		current smoking	-	242	157	0.838935	0.0216593	3.40198e-55	56	0.738854	0.789256	0.694611	0.823276	0.335575	0.52811
									78	0.624204	0.921488	0.837607	0.79078	0.38391	0.545691
			+	25	26	0.785385	0.0660607	1.56004e-05	69.1	0.769231	0.76	0.769231	0.76	0.332948	0.529231
		diabetes mellitus	-	217	129	0.821259	0.0248942	4.2205e-38	58.8	0.713178	0.797235	0.676471	0.82381	0.351255	0.510413
									64.8471	0.682171	0.83871	0.715447	0.816143	0.356413	0.52088
			+	50	54	0.855556	0.0379747	7.75332e-21	62.5343	0.777778	0.84	0.84	0.777778	0.27383	0.617778
									83.2	0.685185	0.96	0.948718	0.738462	0.317346	0.645185
		hypertension	-	72	34	0.853758	0.0399293	8.02865e-19	49.3	0.794118	0.805556	0.658537	0.892308	0.283189	0.599673
			+	195	149	0.826588	0.0240245	4.34979e-42	64.8471	0.731544	0.825641	0.762238	0.800995	0.320109	0.557185
									78	0.671141	0.897436	0.833333	0.78125	0.344482	0.568577
		dyslipidemia	-	108	65	0.853561	0.0317515	8.44972e-29	55.3086	0.815385	0.805556	0.716216	0.878788	0.268126	0.62094
			+	159	118	0.822034	0.0269197	5.56806e-33	65.7702	0.677966	0.849057	0.769231	0.780347	0.355654	0.527023
									78	0.635593	0.91195	0.842697	0.771277	0.374894	0.547543
		hyperuricemia	-	175	81	0.811252	0.0318566	1.50817e-22	47.0204	0.753086	0.782857	0.616162	0.872611	0.328812	0.535944
			+	92	102	0.839408	0.0285098	1.11552e-32	64.8471	0.754902	0.804348	0.810526	0.747475	0.313613	0.55925
									78.2	0.696078	0.869565	0.855422	0.720721	0.330729	0.565644
									65.2531	0.707865	0.813953	0.797468	0.729167	0.346347	0.521819
		CKD G stagre	G1-3a	198	104	0.786422	0.0297047	5.29789e-22	47.0204	0.701923	0.762626	0.608333	0.82967	0.381046	0.464549
									51.7	0.673077	0.792929	0.630631	0.82199	0.386984	0.466006
			G3b-4	69	79	0.894698	0.0260838	9.97578e-52	64.8471	0.848101	0.811594	0.8375	0.823529	0.242012	0.659695
		24hr urine salt 3 quantile	first	98	52	0.863619	0.0328252	1.61433e-28	58.8	0.75	0.836735	0.709091	0.863158	0.298589	0.586735
									72.2	0.711538	0.908163	0.804348	0.855769	0.302728	0.619702
			second	90	60	0.82	0.0386769	1.29904e-16	51	0.8	0.744444	0.676056	0.848101	0.324513	0.544444
			third	79	71	0.818684	0.0353188	1.82891e-19	78.8	0.676056	0.886076	0.842105	0.752688	0.343392	0.562132
		urine creatinine (mg/dL)	first	93	57	0.789851	0.0400794	4.76213e-13	51.7	0.649123	0.827957	0.698113	0.793814	0.390786	0.47708
		3 quantile							65.2734	0.596491	0.892473	0.772727	0.783019	0.41759	0.488964
			second	80	70	0.849643	0.0320815	1.17073e-27	73.6	0.685714	0.925	0.888889	0.770833	0.323111	0.610714
			third	94	56	0.870156	0.0331165	5.26232e-29	63.7557	0.857143	0.787234	0.705882	0.902439	0.256276	0.644377
		calculateded urine osmolality	first	95	55	0.809091	0.0378919	3.42922e-16	47.0204	0.709091	0.778947	0.65	0.822222	0.365366	0.488038
		(mOsm/KgH2O)							51	0.672727	0.831579	0.698113	0.814433	0.368067	0.504306
		3 quantile	second	86	64	0.824764	0.0368096	1.11636e-18	38.2909	0.84375	0.674419	0.658537	0.852941	0.361133	0.518169
									65.7702	0.65625	0.872093	0.792453	0.773196	0.366775	0.528343
			third	86	64	0.881086	0.0301913	1.58919e-36	75.7	0.8125	0.848837	0.8	0.858824	0.240845	0.661337
		24hr urine creatinine (g/day)	first	103	47	0.807065	0.0446	5.78427e-12	68.6	0.680851	0.902913	0.761905	0.861111	0.33359	0.583764
		3 quantile	second	84	66	0.846411	0.033777	1.11436e-24	64.8471	0.727273	0.845238	0.786885	0.797753	0.313578	0.572511
			third	80	70	0.829464	0.0334561	7.01484e-23	56.3	0.757143	0.725	0.706667	0.773333	0.366885	0.482143
									78.5	0.642857	0.875	0.818182	0.736842	0.378386	0.517857
		ACEI/ARB/MRA	-	109	57	0.831643	0.0346189	9.71971e-22	47.0204	0.754386	0.807339	0.671875	0.862745	0.312161	0.561725
			+	158	126	0.833208	0.0260022	1.35866e-37	64.8471	0.761905	0.816456	0.768	0.811321	0.300629	0.57836
									78	0.698413	0.892405	0.838095	0.787709	0.320206	0.590818
		SGLT2i	-	217	110	0.795769	0.0278547	2.45052e-26	47.0204	0.736364	0.741935	0.591241	0.847368	0.368919	0.478299
			+	50	73	0.880822	0.0310399	1.33239e-34	74.9203	0.808219	0.86	0.893939	0.754386	0.237444	0.668219
									85	0.767123	0.92	0.933333	0.730159	0.246235	0.687123
		statin	-	133	86	0.819942	0.0312382	1.28505e-24	56.3	0.767442	0.789474	0.702128	0.84	0.313695	0.556916
			+	134	97	0.846169	0.0273718	1.16393e-36	73.6	0.680412	0.88806	0.814815	0.793333	0.338625	0.568472
									78	0.670103	0.91791	0.855263	0.793548	0.339957	0.588014
		AUC area under curve, SE standard error, CO cutoff value ,PPV positive predictive value, NPV negative predictive value, Se sensitivity, Sp specificity
		WC: waist circumference, BMI: body mass index, CKD: chronic kidney disease, ACEI: angiotensin-converting-enzyme inhibitor, ARB: angiotensin receptor blocker, MRA mineralocorticoid receptor antagonist
		SGLT2i: sodium glucose cotransporter 2 inhibitor
		*CO of minimum distance on the ROC curve closest to the (0,1) or Youden's Index

## Sheet: Sheet12
		Supplementary Table 4. Analysis of 1 factors associated with 24-hr albuminuria ≥30 mg in patients with lifestyle-related diseases
		and CKD G1–3a by logistic regression model
			Model	R2	P Value	Variable	Coefficient	Std. Err.	P Value
		CKD G1–3a	A	0.00218332	0.356802	age (year)	-0.00941304	0.0102068	0.356407
		24-hr albuminuria				constant term	-0.00553507	0.70076	0.993698
		<30 mg (n=198)
		≥30 mg (n=104)	B	0.0311559	0.000499681	sex†	0.867268	0.254246	0.000646933	**
						constant term	-1.14788	0.199796	9.17697e-09	**
			C	0.00732182	0.0915142	current smoking†	0.610252	0.358519	0.0887279
						constant term	-0.721478	0.130694	3.38286e-08	**
			D	0.050424	9.4948e-06	BMI (Kg/m2)	0.134105	0.0320853	2.91976e-05	**
						constant term	-3.93995	0.802669	9.17431e-07	**
			E	0.00752098	0.0872177	hypertension†	0.473434	0.281613	0.0927333
						constant term	-0.99164	0.244146	4.87234e-05	**
			F	0.0141097	0.019154	diabetes mellitus†	0.659556	0.279959	0.0184778	*
						constant term	-0.804738	0.141775	1.37739e-08	**
			G	0.0111025	0.0377136	dyslipidemia†	0.526194	0.256424	0.0401651	*
						constant term	-0.976915	0.2074	2.47354e-06	**
			H	0.0424883	4.80336e-05	hyperuricemia†	1.08791	0.268729	5.15746e-05	**
						constant term	-0.9643	0.150477	1.47178e-10	**
			I	0.239426	4.93364e-22	24-hr proteinuria (mg)	0.0252917	0.00375586	1.65138e-11	**
						constant term	-2.05782	0.238359	5.9613e-18	**
			J	0.0494754	1.1518e-05	24-hr urine salt (g)	0.119461	0.0281416	2.18606e-05	**
						constant term	-1.88638	0.323918	5.75836e-09	**
			K	0.000153657	0.806877	urine creatinine (mg/dL)	-0.000876427	0.00359439	0.807361
						constant term	-0.585019	0.269546	0.0299775	*
			L	0.00514739	0.157105	c-urine osmolality (mOsm/KgH2O)	0.00102625	0.000725724	0.157332
						constant term	-1.11286	0.355989	0.00177141	**
			M	0.0322056	0.000401521	24-hr urine creatinine (g)	1.05488	0.305021	0.000543455	**
						constant term	-1.7942	0.360319	6.37569e-07	**
			N	0.00935502	0.0564656	ACEI, ARB or MRA†	0.476047	0.251941	0.0588229
						constant term	-0.933288	0.199518	2.90086e-06	**
			O	0.0412555	6.18642e-05	SGLT2i†	1.16707	0.293171	6.86704e-05	**
						constant term	-0.907557	0.142621	1.97304e-10	**
			P	0.0032735	0.259186	statin†	0.273756	0.243013	0.259952
						constant term	-0.784581	0.176027	8.30459e-06	**
		R2: the determination coefficient, Std.Err. : standard error, BMI: body mass index, c-urine osmolality: calculated urine osmolality
		*：P<0.05 **：P<0.01
		†: categorical variables, male:1, female:0, or presence of variable: 1, absence of variable: 0

## Sheet: Sheet13
		Supplementary Table 5. Analysis of 2 factors associated with 24-hr albuminuria ≥30 mg in patients with lifestyle-related diseases
		and CKD G1–3a by logistic regression model
			Model	R2	P Value	Variable	Coefficient	Std. Err.	P Value
		CKD G1–3a	A	0.240739	4.67064e-21	age (year)	-0.00865881	0.0120971	0.474128
		24-hr albuminuria				24-hr proteinuria (mg)	0.0253958	0.0037617	1.46676e-11	**
		<30 mg (n=198)				constant term	-1.47403	0.843991	0.0807244
		≥30 mg (n=104)
			B	0.24012	5.26816e-21	sex†	0.155923	0.299882	0.603101
						24-hr proteinuria (mg)	0.0247638	0.00386531	1.48742e-10	**
						constant term	-2.11921	0.267972	2.60897e-15	**
			C	0.242133	3.56143e-21	current smoking†	0.446486	0.430545	0.299725
						24-hr proteinuria (mg)	0.0251194	0.00374804	2.0557e-11	**
						constant term	-2.10411	0.243859	6.2228e-18	**
			D	0.24114	4.32009e-21	hypertension†	0.26982	0.333178	0.418034
						24-hr proteinuria (mg)	0.0249973	0.00375955	2.95063e-11	**
						constant term	-2.24264	0.335514	2.32191e-11	**
			E	0.244749	2.14157e-21	diabetes mellitus†	0.478344	0.329629	0.146736
						24-hr proteinuria (mg)	0.0249583	0.00375934	3.15829e-11	**
						constant term	-2.15902	0.252407	1.19148e-17	**
			F	0.251749	5.49015e-22	dyslipidemia†	0.66042	0.307476	0.031724	*
						24-hr proteinuria (mg)	0.025571	0.00380302	1.7697e-11	**
						constant term	-2.49	0.325494	2.011e-14	**
			G	0.26419	4.88588e-23	hyperuricemia	0.979886	0.314808	0.00185417	**
						24-hr proteinuria (mg)	0.0248562	0.00377185	4.40053e-11	**
						constant term	-2.32541	0.264865	1.64026e-18	**
			H	0.262859	5.48685e-23	BMI (Kg/m2)	0.111506	0.0378801	0.00324374	**
						24-hr proteinuria (mg)	0.0249026	0.00383076	7.99562e-11	**
						constant term	-4.7674	0.974689	1.00223e-06	**
			I	0.250536	5.48685e-23	24-hr proteinuria (mg)	0.0243288	0.0037758	1.16879e-10	**
						24-hr urine salt (g/day)	0.0679053	0.03267	0.0376615	*
						constant term	-2.69847	0.402973	2.13614e-11	**
			J	0.24899	5.48685e-23	24-hr proteinuria (mg)	0.0269336	0.00400768	1.81095e-11	**
						urine creatinine (mg/dL)	-0.00818182	0.00437204	0.06129
						constant term	-1.58481	0.338946	2.92969e-06	**
			K	0.245229	5.48685e-23	24hr proteinuria (mg)	0.0269944	0.00405478	2.78693e-11	**
						c-urine osmolality (mOsm/KgH2O)	-0.00136292	0.000919574	0.138308
						constant term	-1.52475	0.422092	0.000303415	**
			L	0.244106	5.48685e-23	24-hr proteinuria (mg)	0.0245558	0.00377546	7.81783e-11	**
						24-hr urine creatinine (g)	0.470474	0.348196	0.176638
						constant term	-2.52821	0.430665	4.34509e-09	**
			M	0.240373	5.01529e-21	ACEI, ARB or MRA†	0.181051	0.298736	0.544479
						24-hr proteinuria (mg)	0.02495	0.00378082	4.13645e-11	**
						constant term	-2.15138	0.286962	6.52464e-14	**
			N	0.24425	2.35995e-21	SGLT2i†	0.502113	0.362614	0.166143
						24-hr proteinuria (mg)	0.0245983	0.00381933	1.19098e-10	**
						constant term	-2.1188	0.245783	6.65938e-18	**
			O	0.241703	3.87249e-21	statin†	0.270718	0.288159	0.347488
						24-hr proteinuria (mg)	0.0253945	0.00378803	2.02974e-11	**
						constant term	-2.19761	0.285733	1.4582e-14	**
		R2: the determination coefficient, Std.Err. : standard error, BMI: body mass index, c-urine osmolality: calculated urine osmolality
		*：P<0.05 **：P<0.01
		†: categorical variables, male:1, female:0, or presence of variable: 1, absence of variable: 0

## Sheet: Sheet14
		Supplementary Table 6. Analysis of 3 factors associated with 24-hr albuminuria ≥30 mg in patients lifestyle-related diseases
		and CKD G1–3a by logistic regression model
			Model	R2	P Value	Variable	Coefficient	Std. Err.	P Value
		CKD G1–3a	A	0.267019	2.31363e-22	BMI (Kg/m2)	0.0981178	0.0394678	0.0129179	*
		24-hr albuminuria				24-hr proteinuria (mg)	0.0242885	0.00384008	2.53205e-10	**
		<30 mg (n=198)				24-hr urine salt (g)	0.0439304	0.0344593	0.202362
		≥30 mg (n=104)				constant term	-4.85655	0.985751	8.36083e-07	**
			B	0.284369	8.17457e-24	BMI (Kg/m2)	0.143806	0.0405032	0.000384513	**
						24-hr proteinuria (mg)	0.0273383	0.00415976	4.96116e-11	**
						urine creatinine (mg/dL)	-0.013244	0.0047597	0.00539387	**
						constant term	-4.79033	0.986299	1.19255e-06	**
			C	0.276368	3.82003e-23	BMI (Kg/m2)	0.133607	0.0399942	0.000835778	**
						24-hr proteinuria (mg)	0.0275275	0.00421331	6.42594e-11	**
						c-urine osmolality (mOsm/KgH2O)	-0.0022028	0.000985095	0.0253431	*
						constant term	-4.44159	0.993507	7.79933e-06	**
			D	0.262934	5.08072e-22	BMI (Kg/m2)	0.108924	0.0407992	0.00759065	**
						24-hr proteinuria (mg)	0.0248153	0.00386142	1.30595e-10	**
						24-hr urine creatinine (g)	0.0658205	0.383532	0.863739
						constant term	-4.7706	0.97644	1.0306e-06	**
			E	0.260408	8.26517e-22	24-hr proteinuria (mg)	0.02594	0.00402756	1.1898e-10	**
						24-hr urine salt (g)	0.069101	0.0328574	0.0354604	*
						urine creatinine (mg/dL)	-0.00842014	0.00444728	0.0583148
						constant term	-2.22118	0.46637	1.91011e-06	**
			F	0.266574	2.52061e-22	24-hr proteinuria (mg)	0.0267538	0.00413468	9.76192e-11	**
						24-hr urine salt (g)	0.103148	0.0362186	0.00440039	**
						c-urine osmolality (mOsm/KgH2O)	-0.00248948	0.00102589	0.0152391	*
						constant term	-2.05058	0.473377	1.47882e-05	**
			G	0.250701	5.35692e-21	24-hr proteinuria (mg)	0.0242411	0.00378723	1.54611e-10	**
						24-hr urine salt (g)	0.0624854	0.0390341	0.109423
						24-hr urine creatinine (g)	0.106493	0.42007	0.799872
						constant term	-2.75384	0.459704	2.09246e-09	**
		R2: the determination coefficient, Std.Err. : standard error, BMI: body mass index, c-urine osmolality: calculated urine osmolality
		*：P<0.05 **：P<0.01

## Sheet: Sheet15
		Supplementary Table 7. Analysis of 4 factors associated with 24-hr albuminuria ≥30 mg in patients with lifestyle-related diseases
		and CKD G1–3a by logistic regression model
			Model	R2	P Value	Variable	Coefficient	Std. Err.	P Value
		CKD G1–3a	A	0.287474	2.31363e-22	BMI (Kg/m2)	0.13242	0.0420069	0.00161968	**
		24-hr albuminuria				24-hr proteinuria (mg)	0.0267344	0.00417559	1.52819e-10	**
		<30 mg (n=198)				24-hr urine salt (g)	0.0382466	0.0347887	0.271594
		≥30 mg (n=104)				urine creatinine (mg/dL)	-0.0128962	0.00475903	0.00673162	**
						constant term	-4.89399	1.00174	1.03159e-06	**
			B	0.289284	2.31363e-22	BMI (Kg/m2)	0.118684	0.0411579	0.00393122	**
						24-hr proteinuria (mg)	0.0272605	0.00425958	1.55577e-10	**
						24-hr urine salt (g)	0.0840176	0.0376753	0.0257447	*
						c-urine osmolality (mOsm/KgH2O)	-0.00305698	0.00107838	0.00458581	**
						constant term	-4.53508	1.01324	7.61226e-06	**
			C	0.267751	2.31363e-22	BMI (Kg/m2)	0.104226	0.0409623	0.0109454	*
						24-hr proteinuria (mg)	0.0244503	0.00385879	2.35409e-10	**
						24-hr urine salt (g)	0.0546204	0.0399324	0.171368
						24-hr urine creatinine (g)	-0.23869	0.448982	0.594985
						constant term	-4.86696	0.982133	7.21462e-07	**
		R2: the determination coefficient, Std.Err. : standard error, BMI: body mass index, c-urine osmolality: calculated urine osmolality
		*：P<0.05 **：P<0.01

## Sheet: Sheet16
		Supplementary Table 8. Analysis of 5 factors associated with 24-hr albuminuria ≥30mg in patients with lifestyle-related diseases
		and CKD G1–3a by logistic regression model
			Model	R2	P Value	Variable	Coefficient	Std. Err.	P Value
		CKD G1–3a	A	0.289291	1.20842e-22	age (year)	0.000738306	0.013795	0.957318
		24-hr albuminuria				BMI (Kg/m2)	0.119118	0.0419429	0.00451122	**
		<30 mg (n=198)				24-hr proteinuria (mg)	0.0272341	0.00428685	2.11215e-10	**
		≥30 mg (n=104)				24-hr urine salt (g)	0.0843347	0.0381296	0.0269811	*
						c-urine osmolality (mOsm/KgH2O)	-0.00304984	0.00108662	0.00500466	**
						constant term	-4.60123	1.59891	0.00400548	**
			B	0.289544	1.15186e-22	sex†	0.107745	0.338334	0.750138
						BMI (Kg/m2)	0.118372	0.0412308	0.00409236	**
						24-hr proteinuria (mg)	0.0269929	0.00432907	4.50965e-10	**
						24-hr urine salt (g)	0.081254	0.0386285	0.0354244	*
						c-urine osmolality (mOsm/KgH2O)	-0.00312802	0.00110174	0.00452322	**
						constant term	-4.51424	1.01652	8.95945e-06	**
			C	0.290493	9.62479e-23	current smoking†	0.320629	0.463931	0.489493
						BMI (Kg/m2)	0.120016	0.0414888	0.00381919	**
						24-hr proteinuria (mg)	0.0271217	0.00425077	1.76588e-10	**
						24-hr urine salt (g)	0.0813361	0.037856	0.0316688	*
						c-urine osmolality (mOsm/KgH2O)	-0.00302225	0.00107861	0.00507894	**
						constant term	-4.58602	1.02334	7.41395e-06	**
			D	0.289644	1.13022e-22	hypertension†	0.130613	0.349893	0.70893
						BMI (Kg/m2)	0.116352	0.0415577	0.00511384	**
						24-hr proteinuria (mg)	0.0271325	0.00426494	1.99458e-10	**
						24-hr urine salt (g)	0.0838246	0.0376806	0.0261073	*
						c-urine osmolality (mOsm/KgH2O)	-0.00306127	0.00107901	0.00455217	**
						constant term	-4.56465	1.01648	7.10155e-06	**
			E	0.294003	4.95015e-23	diabetes†	0.471671	0.345774	0.172535
						BMI (Kg/m2)	0.115187	0.0414074	0.00540573	**
						24-hr proteinuria (mg)	0.0269917	0.00425834	2.31918e-10	**
						24-hr urine salt (g)	0.0828532	0.0375221	0.0272362	*
						c-urine osmolality (mOsm/KgH2O)	-0.00313423	0.00108184	0.00376592	**
						constant term	-4.50513	1.01978	9.97317e-06	**
			F	0.295623	3.64193e-23	dyslipidemia†	0.495577	0.319127	0.120443
						BMI (Kg/m2)	0.110697	0.0418189	0.00811964	**
						24-hr proteinuria (mg)	0.0275131	0.0042897	1.41976e-10	**
						24-hr urine salt (g)	0.0819208	0.0377276	0.0299028	*
						c-urine osmolality (mOsm/KgH2O)	-0.0029921	0.00109012	0.00605553	**
						constant term	-4.67424	1.02959	5.628e-06	**
			G	0.306566	4.57587e-24	hyperuricemia	0.860791	0.330332	0.00916507	**
						BMI (Kg/m2)	0.104254	0.0427091	0.0146453	*
						24-hr proteinuria (mg)	0.0271989	0.00427925	2.07074e-10	**
						24-hr urine salt (g)	0.0798023	0.0382604	0.0369996	*
						c-urine osmolality (mOsm/KgH2O)	-0.00318051	0.00109985	0.00383062	**
						constant term	-4.3339	1.04354	3.28043e-05	**
		R2: the determination coefficient, Std.Err. : standard error, BMI: body mass index, c-urine osmolality: calculated urine osmolality
		*：P<0.05 **：P<0.01
		†: categorical variables, male:1, female:0, or presence of variable: 1, absence of variable: 0

## Sheet: Sheet17
		Supplementary Table 9. Analysis of 1 factors associated with 24-hr albuminuria ≥30 mg in patients with lifestyle-related diseases
		and CKD G3b–4 by logistic regression model
			Model	R2	P Value	Variable	Coefficient	Std. Err.	P Value
		CKD G3b–4	A	0.0216967	0.0351706	age (year)	-0.0395731	0.0196645	0.0441761	*
		24-hr albuminuria				constant term	3.21842	1.54714	0.0375036	*
		<30 mg/day (n=69)
		≥30 mg/day (n=79)	B	0.00487817	0.317901	sex†	0.337257	0.338078	0.318487
						constant term	-0.0689929	0.262769	0.792889
			C	0.00144974	0.586106	current smoking†	0.300105	0.55492	0.588641
						constant term	0.105361	0.173663	0.544052
			D	0.0236504	0.0278651	BMI (Kg/m2)	0.106755	0.049955	0.0325961	*
						constant term	-2.39079	1.19048	0.0446162
			E	4.7808e-05	0.921237	hypertension†	0.0466601	0.471767	0.921214
						constant term	0.0953102	0.436931	0.827324
			F	0.00818184	0.195837	diabetes mellitus†	0.508394	0.397214	0.20058
						constant term	0.0176996	0.188152	0.925053
			G	0.00286571	0.443961	dyslipidemia†	-0.254616	0.333078	0.444609
						constant term	0.278713	0.250482	0.265834
			H	0.0012805	0.608848	hyperuricemia†	-0.199129	0.390044	0.609681
						constant term	0.287682	0.341565	0.39965
			I	0.443069	1.75358e-21	24-hr proteinuria (mg)	0.0371952	0.00718531	2.26005e-07	**
						constant term	-2.73594	0.509745	7.9938e-08	**
			J	0.00423609	0.351993	24-hr urine salt (g)	0.0447242	0.0483544	0.355005
						constant term	-0.219822	0.416839	0.597946
			K	0.000247734	0.821918	urine creatinine (mg/dL)	-0.00105565	0.00469224	0.821996
						constant term	0.198202	0.324455	0.541282
			L	0.00222875	0.499608	c-urine osmolality (mOsm/KgH2O)	0.000848934	0.00126008	0.500492
						constant term	-0.192983	0.51386	0.707247
			M	0.00118513	0.622511	24-hr urine creatinine (g)	0.255369	0.51998	0.623346
						constant term	-0.0818009	0.471322	0.862214
			N	0.000114582	0.87834	ACEI, ARB or MRA†	0.0559208	0.365249	0.878317
						constant term	0.0953102	0.308957	0.75771
			O	0.0163229	0.0676989	SGLT2i†	0.617161	0.340475	0.0698864
						constant term	-0.115069	0.214777	0.592124
			P	0.0025122	0.473528	statin†	-0.237046	0.331082	0.474007
						constant term	0.262364	0.242846	0.279977
		R2: the determination coefficient, Std.Err. : standard error, BMI: body mass index, c-urine osmolality: calculated urine osmolality
		*：P<0.05 **：P<0.01
		†: categorical variables, male:1, female:0, or presence of variable: 1, absence of variable: 0

## Sheet: Sheet18
		Supplementary Table 10. Analysis of 2 or 3 factors associated with 24-hr albuminuria ≥30 mg in patients with lifestyle-related diseases
		and CKD G3b–4 by logistic regression model
			Model	R2	P Value	Variable	Coefficient	Std. Err.	P Value
		CKD G3b–4	A	0.443134	2.1008e-20	age (year)	0.003165	0.0276506	0.90887
		24-hr albuminuria				24-hr proteinuria (mg)	0.0373236	0.00727538	2.89539e-07	**
		<30 mg/day (n=69)				constant term	-2.99504	2.3241	0.197507
		≥30 mg/day (n=79)
			B	0.455768	5.77255e-21	sex†	-0.786657	0.498377	0.114466
						24-hr proteinuria (mg)	0.0402642	0.00777402	2.22686e-07	**
						constant term	-2.48851	0.528209	2.46242e-06	**
			C	0.445112	1.71608e-20	current smoking†	-0.480484	0.747442	0.520329
						24-hr proteinuria (mg)	0.0382551	0.00749323	3.30294e-07	**
						constant term	-2.74729	0.514165	9.13165e-08	**
			D	0.456073	5.5951e-21	hypertension†	-0.963563	0.595365	0.105568
						24-hr proteinuria (mg)	0.0380885	0.00722976	1.37695e-07	**
						constant term	-2.01582	0.653163	0.00202704	**
			E	0.444508	1.82531e-20	diabetes mellitus†	-0.338803	0.631424	0.591565
						24-hr proteinuria (mg)	0.037036	0.00713482	2.09308e-07	**
						constant term	-2.66928	0.518134	2.58104e-07	**
			F	0.465107	2.22153e-21	dyslipidemia†	-1.00843	0.483229	0.0369014	*
						24-hr proteinuria (mg)	0.0378714	0.00720904	1.49379e-07	**
						constant term	-2.20488	0.547396	5.62672e-05	**
			G	0.450785	9.60782e-21	hyperuricemia†	-0.69327	0.553598	0.210461
						24-hr proteinuria (mg)	0.0381474	0.00732075	1.87969e-07	**
						constant term	-2.26449	0.610745	0.000209103	**
			H	0.446462	1.49483e-20	BMI	0.0577181	0.0699646	0.409393
						24-hr proteinuria (mg)	0.0365032	0.00719595	3.92113e-07	**
						constant term	-4.05338	1.69908	0.0170496	*
			I	0.443509	2.02161e-20	24-hr proteinuria (mg)	0.0371706	0.00718216	2.27406e-07	**
						24-hr urine salt (g)	-0.0215419	0.0718837	0.764423
						constant term	-2.56988	0.745894	0.000570286	**
			J	0.46145	3.22861e-21	24-hr proteinuria (mg)	0.042011	0.00814756	2.51915e-07	**
						urine creatinine (mg/dL)	-0.0114467	0.00624727	0.0669102
						constant term	-2.32917	0.564451	3.68426e-05	**
			K	0.466648	1.89769e-21	24-hr proteinuria (mg)	0.0437182	0.00847278	2.4716e-07	**
						c-urine osmolality (mOsm/KgH2O)	-0.00424477	0.00200422	0.0341821	*
						constant term	-1.51203	0.738536	0.040625	*
			L	0.456074	5.59436e-21	24-hr proteinuria (mg)	0.0392345	0.00762704	2.68753e-07	**
						24-hr urine creatinine (g)	-1.29624	0.811964	0.110393
						constant term	-1.81752	0.739599	0.013993	*
			M	0.462671	2.8498e-21	ACEi, ARB or MRA†	-1.01971	0.51907	0.0494739	*
						24-hr proteinuria (mg)	0.0397922	0.00745666	9.47773e-08	**
						constant term	-2.21262	0.553505	6.40231e-05	**
			N	0.44819	1.25276e-20	SGLT2i†	-0.506751	0.501654	0.312418
						24-hr proteinuria (mg)	0.0383872	0.00736736	1.88387e-07	**
						constant term	-2.63363	0.514875	3.13596e-07	**
			O	0.461149	3.32972e-21	statin†	-0.90599	0.480307	0.0592583
						24-hr proteinuria (mg)	0.0382361	0.00730022	1.62625e-07	**
						constant term	-2.35634	0.532278	9.56008e-06	**
			P	0.482961	2.86689e-21	dyslipidemia†	-0.892412	0.494836	0.0713174
						24-hr proteinuria (mg)	0.0441619	0.00860925	2.90377e-07	**
						c-urine osmolality (mOsm/KgH2O)	-0.00380438	0.00204358	0.0626562
						constant term	-1.20384	0.746836	0.10698
			Q	0.482405	3.03272e-21	ACEI, ARB or MRA†	-0.935519	0.529137	0.0770591
						24-hr proteinuria (mg)	0.0461928	0.00889964	2.09828e-07	**
						c-urine osmolality (mOsm/KgH2O)	-0.00398984	0.002045	0.0510543
						constant term	-1.1403	0.758038	0.132508
		R2: the determination coefficient, Std.Err. : standard error, c-urine osmolality: calculated urine osmolality
		*：P<0.05 **：P<0.01
		†: categorical variables, male:1, female:0, or presence of variable: 1, absence of variable: 0

[truncated: 15 more sheets: Sheet19, Sheet20, Sheet21, Sheet22, Sheet23, Sheet24, Sheet25, Sheet26, Sheet27, Sheet28, Sheet29, Sheet30, Sheet31, Sheet32, Sheet33]
